# Supplementary material for: Protein Phosphatase 2A as a Therapeutic Target in Small Cell Lung Cancer
Source: PubMed Central journal article supplement — Mol Cancer Ther. 2021 Jul 12;20(10):1820–35. doi: 10.1158/1535-7163.MCT-21-0013 (PMC8722383; doi:10.1158/1535-7163.mct-21-0013), 2021-07-12
Supplement: NIHMS1725090-supplement-2.pdf [file NIHMS1725090-supplement-2.pdf]

## Supplemental Figure 2

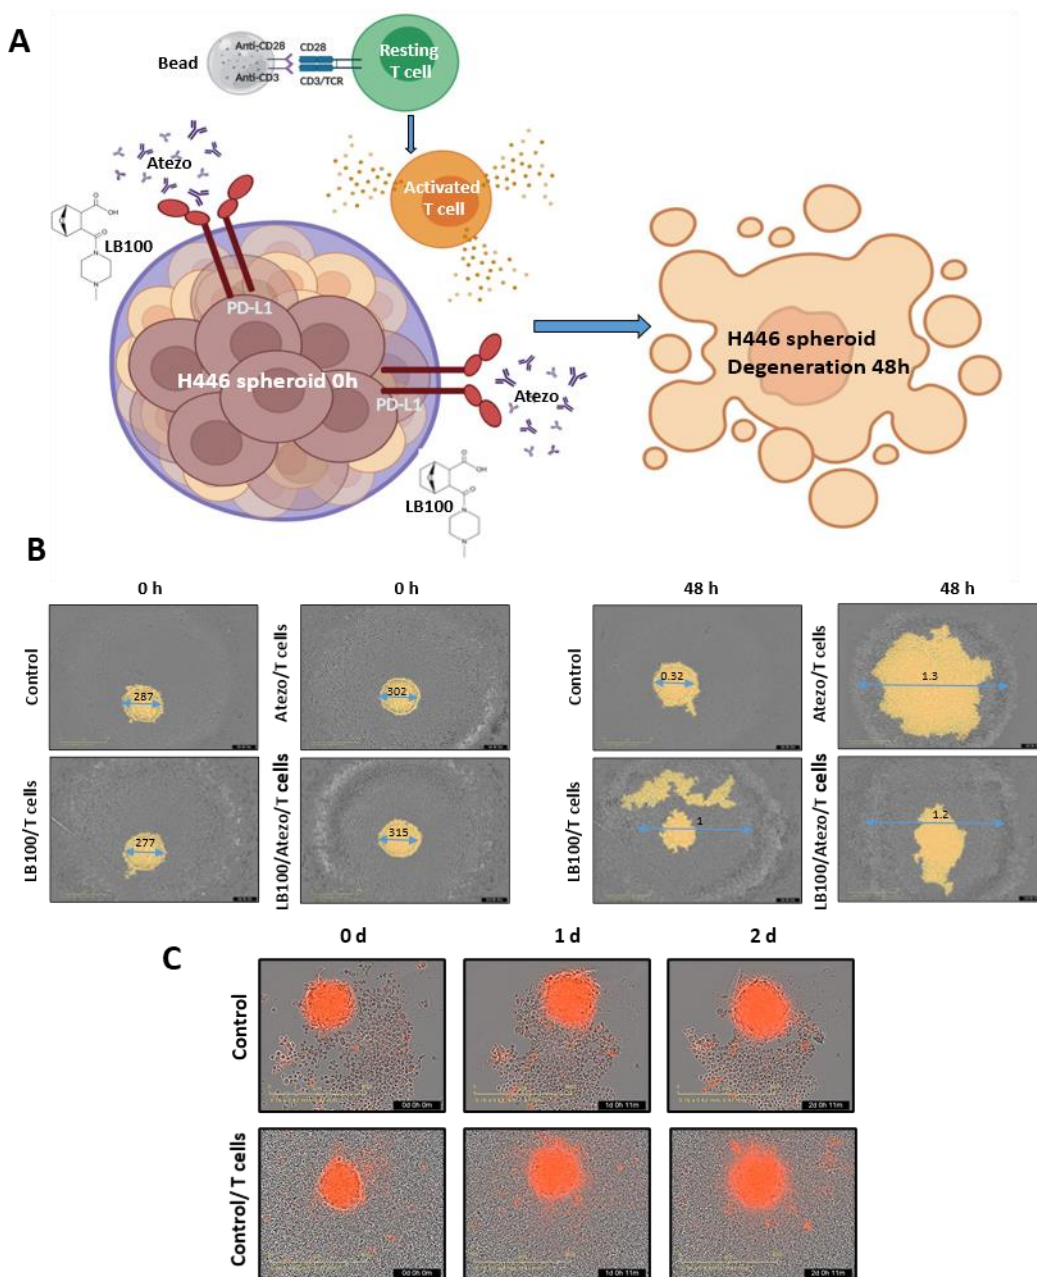

**Fig. S2. T cells infiltration in H446 spheroids in the presence of LB100 and atezolizumab.** (A) Schematic of the effect of activated T cells on H446 spheroid degradation. At time point 0, single spheroids in 96 well plate were treated with LB100, atezolizumab and T cells. Beads mimic in vivo T cell activation by two action signals CD3 and CD28. IncuCyte® Live-Cell Analysis System was used for the spheroidal imaging. Right panel schematic representation of spheroidal degeneration after 48 h incubation with LB100/atezolizumab and activated T cells (BioRender). (B) Automated image analysis provides metrics (0h - $\mu\text{m}$ , 48h - $\text{mm}$ ) and spheroid area (yellow-

bright field mask). Representative images in bright field mask with measurement of H446 spheroidal cell distribution at 0 and 48h. (C) Immunofluorescence images of spheroids from cells stained with 150 nM MitoTracker are showing the morphology of control spheroids (upper panel) and spheroids with T cells (low panel) throughout the time course is indicated.
