# Supplementary material for: Protein Phosphatase 2A as a Therapeutic Target in Small Cell Lung Cancer
Source: PubMed Central journal article supplement — Mol Cancer Ther. 2021 Jul 12;20(10):1820–35. doi: 10.1158/1535-7163.MCT-21-0013 (PMC8722383; doi:10.1158/1535-7163.mct-21-0013), 2021-07-12
Supplement: NIHMS1725090-supplement-3.pdf [file NIHMS1725090-supplement-3.pdf]

### Supplemental Figure 3

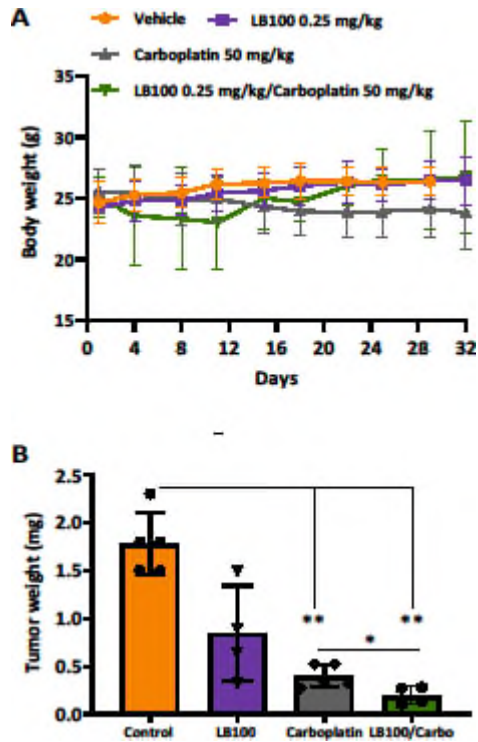

**Fig. S3. Body weight changes and tumor masses after drug treatments.** (A) Body weights were measured after LB100, carboplatin or drug combination. (B) Tumor mass was measured at the end of experiment. Compared with vehicle group, LB100 or carboplatin alone, or a combination of LB100 with carboplatin significantly reduced tumor mass.
